# Supplementary material for: sybil – Efficient constraint-based modelling in R
Source: PubMed Central journal article supplement (PMC3843580; doi:10.1186/1752-0509-7-125), 2013-11-13
Supplement: 1752-0509-7-125-S2.pdf [file 1752-0509-7-125-S2.pdf]

|                 | Knockout mutants |                      |      |      | Other algorithms                 |     |                                      |                     |                   |                |                                      |               |          | Input files                           |                | Network tools             |                |                                        |                       |                        |   |
|-----------------|------------------|----------------------|------|------|----------------------------------|-----|--------------------------------------|---------------------|-------------------|----------------|--------------------------------------|---------------|----------|---------------------------------------|----------------|---------------------------|----------------|----------------------------------------|-----------------------|------------------------|---|
|                 | FBA              | gene knockouts (FBA) | MOMA | ROOM | series of knockouts <sup>a</sup> | FVA | total flux minimisation <sup>b</sup> | robustness analysis | PhPP <sup>c</sup> | dynamic FBA    | series of optimisations <sup>d</sup> | flux coupling | sampling | elementary modes/<br>extreme pathways | SBML           | column based <sup>e</sup> | fluxomics data | integration of gene<br>expression data | network visualisation | network reconstruction |   |
| sybil           | ✓                | ✓                    | ✓    | ✓    | ✓                                | ✓   | ✓                                    | ✓                   | ✓                 | ✓ <sup>f</sup> | ✓                                    | ✓             |          |                                       | ✓ <sup>g</sup> | ✓                         |                |                                        | ✓ <sup>h</sup>        |                        |   |
| abcdeFBA        | ✓                |                      |      |      |                                  | ✓   |                                      | ✓                   |                   |                |                                      |               |          |                                       |                |                           |                |                                        |                       |                        |   |
| BiGGR           | ✓                |                      |      |      |                                  |     |                                      |                     |                   |                |                                      |               |          |                                       |                |                           |                |                                        |                       |                        |   |
| COBRA Toolbox   | ✓                | ✓                    | ✓    |      | ✓                                | ✓   | ✓                                    | ✓                   | ✓                 | ✓              |                                      | ✓             | ✓        | ✓                                     | ✓              | ✓                         | ✓              | ✓                                      | ✓                     | ✓                      | ✓ |
| COBRAPy         | ✓                | ✓                    | ✓    |      | ✓                                |     |                                      |                     |                   |                | ✓                                    |               |          |                                       | ✓              |                           |                |                                        |                       |                        |   |
| fastFVA         |                  |                      |      |      |                                  | ✓   |                                      |                     |                   |                | ✓                                    |               |          |                                       |                |                           |                |                                        |                       |                        |   |
| CellNetAnalyzer | ✓                | ✓                    |      |      |                                  | ✓   |                                      |                     |                   |                |                                      |               |          | ✓                                     | ✓              |                           | ✓              |                                        |                       | ✓                      | ✓ |
| SBRT            | ✓                | ✓                    |      |      |                                  | ✓   |                                      |                     |                   |                | ✓                                    |               |          |                                       | ✓              |                           |                |                                        |                       |                        |   |
| OptFlux         | ✓                | ✓                    | ✓    | ✓    |                                  | ✓   |                                      |                     |                   |                |                                      |               |          |                                       | ✓              | ✓                         |                |                                        |                       |                        |   |
| FASIMU          | ✓                | ✓                    | ✓    |      |                                  | ✓   | ✓                                    |                     |                   |                |                                      |               |          |                                       | ✓              |                           |                |                                        | ✓                     | ✓ <sup>i</sup>         | ✓ |
| F2C2            |                  |                      |      |      |                                  |     |                                      |                     |                   |                |                                      | ✓             |          |                                       |                |                           |                |                                        |                       |                        |   |

<sup>a</sup> In an automated fashion for a given set of genes, i. e., knocking out one gene per optimisation.

<sup>b</sup> Sum of absolute flux values.

<sup>c</sup> Phenotypic phase planes

<sup>d</sup> Optimised for speed by only applying changes rather than rebuilding the problem object.

<sup>e</sup> e. g., compatible to the output of the BiGG database.

<sup>f</sup> Add-on package sybilDynFBA required, available separately from CRAN.

<sup>g</sup> Add-on package sybilSBML required (Additional file 3).

<sup>h</sup> Add-on package sybilEFBA required, available separately from CRAN.

<sup>i</sup> Cytoscape required.
